# Supplementary material for: Fast Isolation and Purification of the Antidepressant Alkaloids Mesembrine and Mesembrenone From Mesembryanthemum tortuosum
Source: Research Square preprint supplement (doi:10.21203/rs.3.rs-5413491/v1), 2025-01-10
Supplement: Supplementary file 1 [file 6b6f9c679c9deef1bdeb7154.docx]

**Fast isolation and purification of the antidepressant phytochemicals, mesembrine and mesembrenone, from *Mesembryanthemum tortuosum***

Suzanne Elaine Van Niekerk†, Dorothea Malan†, Josias Hendrik Hamman, Frank Van der Kooy*

PharmacenTM, Centre of Excellence for Pharmaceutical Sciences, North-West University, Private Bag X6001, Potchefstroom 2520, South Africa

*Corresponding author: Frank van der Kooy, e-mail: [frank.vanderkooy@nwu.ac.za](mailto:frank.vanderkooy@nwu.ac.za)

**Fig. S1.** A flow diagram depicting the extraction and purification steps, including the time that each step takes, for the purification of mesembrenone and mesembrine from *Mesembryanthemum tortuosum* L. (Mesembryanthemaceae).

**Fig. S2.** HPLC chromatograms and chemical structures of the purified mesembrenone and mesembrine, indicating the level of purity achieved.

**Fig. S3.** NMR spectrum of mesembrenone.

**Fig. S4.** NMR spectrum of mesembrine.

**Fig. S5** LCMS (+) ESI data of mesembrenone.

**Fig. S6.** LCMS (+) ESI data of mesembrine.

**Fig. S7.** UV spectrum of mesembrenone.

**Fig. S8.** UV spectrum of mesembrine.


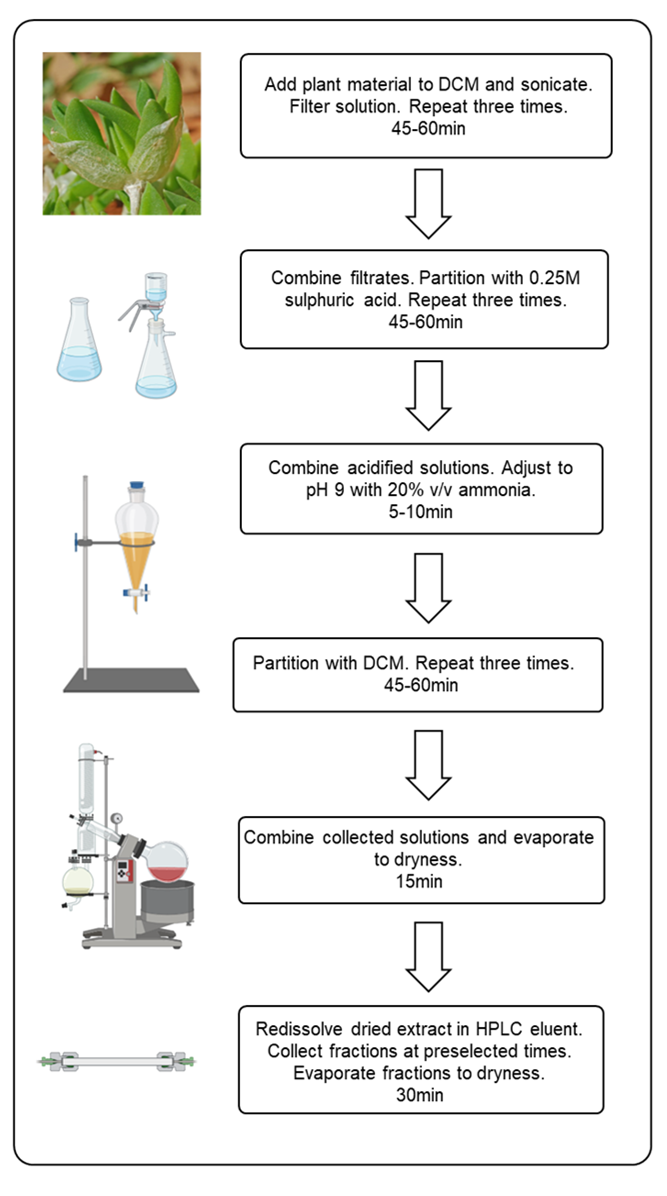


**Fig. S1.** A flow diagram depicting the extraction and purification steps, including the time that each step takes, for the purification of mesembrenone and mesembrine from *Mesembryanthemum tortuosum* L. (Mesembryanthemaceae).


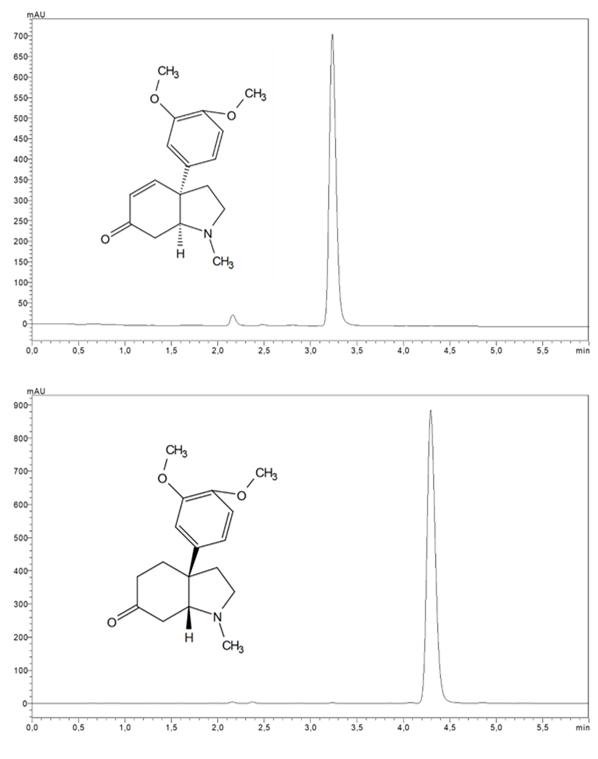


**Fig. S2.** HPLC chromatograms and chemical structures of the purified mesembrenone and mesembrine, indicating the level of purity achieved.

**Fig. S3.** NMR spectrum of mesembrenone.

**Fig. S4.** NMR spectrum of mesembrine.


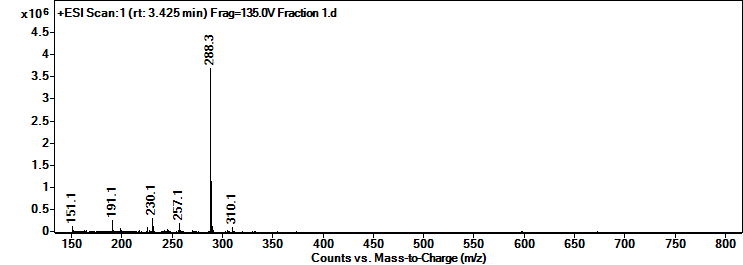


**Fig. S5.** LCMS (+) ESI data of mesembrenone.


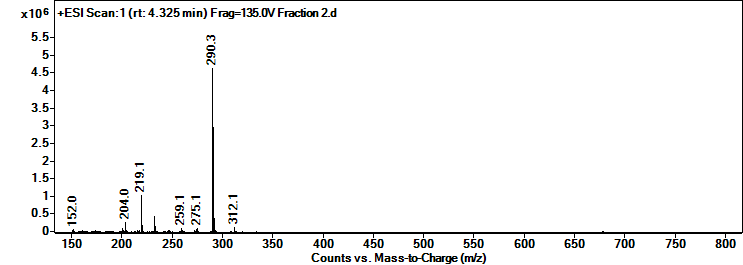


**Fig S6.** LCMS (+) ESI of mesembrine.

**Fig. S7.** UV spectrum of mesembrenone.

**Fig. S8.** UV spectrum of mesembrine.
